# Supplementary material for: Alterations of the gut microbiota in the lupus nephritis: a systematic review
Source: PubMed Central journal article supplement — Ren Fail. 2023 Nov 23;45(2):2285877. doi: 10.1080/0886022X.2023.2285877 (PMC11001323; doi:10.1080/0886022x.2023.2285877), 2023-11-23

## Targeting gut microbiota to treat Lupus Nephritis

**Supplementary table 1** Search strategy

**Supplementary table 2** Quality assessment of selected studies using the Newcastle-Ottawa Scale

**Supplementary table 3** Alpha diversity and Beta diversity between LN and HCs

**Supplementary figure 1** The phylogenetic profile of differentially abundant taxa of LN patients.

## Supplementary table 1 Search strategy

### PubMed

Search number Query Results

5. ((Microbiota[Title/Abstract]) OR (Microbiotas[Title/Abstract]) OR (Microbial Community[Title/Abstract]) OR (Community, Microbial[Title/Abstract]) OR (Microbial Communities[Title/Abstract]) OR (Microbial Community Composition[Title/Abstract]) OR (Community Composition, Microbial[Title/Abstract]) OR (Composition, Microbial Community[Title/Abstract]) OR (Microbial Community Compositions[Title/Abstract]) OR (Microbial Community Structure[Title/Abstract]) OR (Community Structure, Microbial[Title/Abstract]) OR (Microbial Community Structures[Title/Abstract]) OR (Human Microbiome[Title/Abstract]) OR (Human Microbiomes[Title/Abstract]) OR (Microbiome, Human[Title/Abstract]) OR (Microbiome[Title/Abstract])) AND ((Lupus nephritis[Title/Abstract]) OR (Lupus Glomerulonephritis[Title/Abstract]) OR (Nephritis, Lupus[Title/Abstract]) OR (Lupus Nephritides[Title/Abstract]) OR (Nephritides, Lupus[Title/Abstract]) OR (Glomerulonephritis, Lupus[Title/Abstract]) OR (Glomerulonephritides, Lupus[Title/Abstract]) OR (Lupus Glomerulonephritides[Title/Abstract])) 26

4. ((Microbiota[Title/Abstract]) OR (Microbiotas[Title/Abstract]) OR (Microbial Community[Title/Abstract]) OR (Community, Microbial[Title/Abstract]) OR (Microbial Communities[Title/Abstract]) OR (Microbial Community Composition[Title/Abstract]) OR (Community Composition, Microbial[Title/Abstract]) OR (Composition, Microbial Community[Title/Abstract]) OR (Microbial Community Compositions[Title/Abstract]) OR (Microbial Community Structure[Title/Abstract]) OR (Community Structure, Microbial[Title/Abstract]) OR (Microbial Community Structures[Title/Abstract]) OR (Human Microbiome[Title/Abstract]) OR (Human Microbiomes[Title/Abstract]) OR (Microbiome, Human[Title/Abstract]) OR (Microbiome[Title/Abstract])) AND ((Lupus Erythematosus, Systemic[Title/Abstract]) OR (Systemic Lupus Erythematosus[Title/Abstract]) OR (Lupus Erythematosus Disseminatus[Title/Abstract]) OR (Libman-Sacks Disease[Title/Abstract]) OR (Disease, Libman-Sacks[Title/Abstract]) OR (Libman Sacks Disease[Title/Abstract])) 265

3. (Lupus Nephritis[Title/Abstract]) OR (Lupus Glomerulonephritis[Title/Abstract]) OR (Nephritis, Lupus[Title/Abstract]) OR (Lupus Nephritides[Title/Abstract]) OR (Nephritides, Lupus[Title/Abstract]) OR (Glomerulonephritis, Lupus[Title/Abstract]) OR (Glomerulonephritides, Lupus[Title/Abstract]) OR (Lupus Glomerulonephritides[Title/Abstract]) 14200

2. (Lupus Erythematosus, Systemic[Title/Abstract]) OR (Systemic Lupus Erythematosus[Title/Abstract]) OR (Lupus Erythematosus

Disseminatus[Title/Abstract]) OR(Libman-Sacks Disease[Title/Abstract])  
OR(Disease, Libman-Sacks[Title/Abstract]) OR(Libman Sacks  
Disease[Title/Abstract]) 60684

1. (Microbiota[Title/Abstract]) OR (Microbiotas[Title/Abstract]) OR (Microbial  
Community[Title/Abstract]) OR (Community, Microbial[Title/Abstract]) OR  
(Microbial Communities[Title/Abstract]) OR (Microbial Community  
Composition[Title/Abstract]) OR (Community Composition,  
Microbial[Title/Abstract]) OR (Composition, Microbial Community[Title/Abstract])  
OR (Microbial Community Compositions[Title/Abstract]) OR (Microbial Community  
Structure[Title/Abstract]) OR (Community Structure, Microbial[Title/Abstract]) OR  
(Microbial Community Structures[Title/Abstract]) OR (Human  
Microbiome[Title/Abstract]) OR (Human Microbiomes[Title/Abstract]) OR  
(Microbiome, Human[Title/Abstract]) OR (Microbiome[Title/Abstract]) 158342

### **Web of science**

5 #3 AND #1 76

4 #1 AND #2 536

3 TS= (Lupus nephritis OR Lupus Glomerulonephritis OR Nephritis, Lupus OR  
Lupus Nephritides OR Nephritides, Lupus OR Glomerulonephritis, Lupus OR  
Glomerulonephritides, Lupus OR Lupus Glomerulonephritides) 25961

2 TS= (Lupus Erythematosus, Systemic OR Systemic Lupus Erythematosus OR  
Lupus Erythematosus Disseminatu OR Libman-Sacks Disease OR Disease, Libman-  
Sacks OR Libman Sacks Disease) 127956

1 TS= (microbiota OR Microbiotas OR Microbial Community OR Community,  
Microbial OR Microbial Communities OR Microbial Community Composition OR  
Community Composition, Microbial OR Composition, Microbial Community OR  
Microbial Community Compositions OR Microbial Community Structure OR  
Community Structure, Microbial OR Microbial Community Structures OR  
Human Microbiome OR Human Microbiomes OR Microbiome, Human OR  
Microbiome OR Microbiomes) 350878

### **Embase**

5 #1 AND #3 32

4 #1 AND #2 174

3 'lupus nephritis':ab,ti OR 'lupus glomerulonephritis':ab,ti OR 'nephritis, lupus':ab,ti  
OR 'lupus nephritides':ab,ti OR 'nephritides, lupus':ab,ti OR 'glomerulonephritis,  
lupus':ab,ti OR 'glomerulonephritides, lupus':ab,ti OR 'lupus  
glomerulonephritides':ab,ti 17487

2 'lupus erythematosus, systemic':ab,ti OR 'systemic lupus erythematosus':ab,ti OR 'lupus erythematosus disseminatus':ab,ti OR 'libman-sacks disease':ab,ti OR 'disease, libman-sacks':ab,ti OR 'libman sacks disease':ab,ti 84839

1 'microbiotas':ab,ti OR 'microbial community':ab,ti OR 'community, microbial':ab,ti OR 'microbial communities':ab,ti OR 'microbial community composition':ab,ti OR 'community composition, microbial':ab,ti OR 'composition, microbial community':ab,ti OR 'microbial community compositions':ab,ti OR 'microbial community structure':ab,ti OR 'community structure, microbial':ab,ti OR 'microbial community structures':ab,ti OR 'microbiome':ab,ti OR 'microbiomes':ab,ti OR 'human microbiome':ab,ti OR 'human microbiomes':ab,ti OR 'microbiome, human':ab,ti 107530

Supplementary table 2. Quality assessment of selected studies using the Newcastle-Ottawa Scale

| Study                             | Selection |   |   |   | Comparability |    | Ascertainment exposure |   |   | Score |
|-----------------------------------|-----------|---|---|---|---------------|----|------------------------|---|---|-------|
|                                   | 1         | 2 | 3 | 4 | 5A            | 5B | 6                      | 7 | 8 |       |
| Azzouz et al. 2023 [25]           | *         | * | * | * | *             |    | *                      | * |   | 7     |
| Wang et.al.2022 [39]              | *         | * | * | * | *             |    | *                      | * |   | 7     |
| Yu et al.2022 [37]                | *         |   |   | * | *             |    | *                      | * |   | 5     |
| Li et al. 2022 [32]               | *         | * | * | * | *             |    | *                      | * |   | 7     |
| Gerges et al.2021 [29]            | *         | * |   | * | *             |    | *                      | * |   | 6     |
| Tomofuj et al.2021 [35]           | *         | * |   | * | *             |    | *                      | * |   | 6     |
| Chen et al.2020 [28]              | *         | * |   | * | *             |    | *                      | * |   | 6     |
| Azzouz et al.2019 [25]            | *         | * |   | * | *             |    | *                      | * |   | 6     |
| Bellocchi et al.2019 [46]         | *         | * | * | * | *             |    | *                      | * |   | 7     |
| van der Meulen et al.2019 [36]    |           | * | * | * | *             |    | *                      |   |   | 5     |
| Zegarra-Ruiz et al.2019 [38]      | *         | * |   | * | *             |    | *                      | * |   | 6     |
| Greiling et al.2018 [30]          | *         | * |   | * | *             |    | *                      | * |   | 6     |
| Luo et al.2018 [33]               | *         | * |   | * | *             |    | *                      | * |   | 6     |
| Rodríguez-Carrio et al. 2017 [34] | *         | * | * | * | *             |    | *                      | * |   | 7     |
| Hevia et al. 2014 [31]            | *         | * | * | * | *             |    | *                      |   |   | 6     |

**Supplementary Table 3. Alpha diversity and Beta diversity between LN and HCs**

| <b>Study</b>                      | <b>Alpha-diversity Index</b>  | <b>Conclusion</b>                         | <b>Beta-diversity Index</b> | <b>Conclusion</b> |
|-----------------------------------|-------------------------------|-------------------------------------------|-----------------------------|-------------------|
| Azzouz et al. 2023 [25]           | Shannon, Simpson              | Decrease                                  | PCoA                        | Distinct          |
| Wang et.al.2022 [39]              | Chao1, Shannon                | Decrease                                  | NMDS                        | Distinct          |
| Yu et al.2022 [37]                | Chao1, Simpson, Sobs, Shannon | Decrease                                  | PCoA                        | No difference     |
| Li et al. 2022 [32]               | Shannon                       | No difference                             | PCoA                        | No difference     |
| Gerges et al.2021 [29]            | N/A                           | N/A                                       | N/A                         | N/A               |
| Tomofuj et al.2021 [35]           | Shannon                       | Decrease                                  | N/A                         | N/A               |
| Chen et al.2020 [28]              | Shannon                       | Decrease                                  | PCoA                        | Distinct          |
| Azzouz et al.2019 [25]            | Chao1                         | Decrease                                  | PCoA                        | Distinct          |
| Bellocchi et al.2019 [46]         | Chao1, Shannon                | No difference                             | PCoA                        | No difference     |
| van der Meulen et al.2019 [36]    | Chao1, Shannon                | Chao1: Decrease<br>Shannon: No difference | PCoA                        | No difference     |
| Zegarra-Ruiz et al.2019 [38]      | N/A                           | N/A                                       | N/A                         | N/A               |
| Greiling et al.2018 [30]          | Shannon                       | N/A                                       | PCoA                        | Distinct          |
| Luo et al.2018 [33]               | Shannon                       | Decrease                                  | PCoA                        | Distinct          |
| Rodríguez-Carrio et al. 2017 [34] | N/A                           | N/A                                       | N/A                         | N/A               |
| Hevia et al. 2014 [31]            | Chao1, Shannon, Simpson       | No difference                             | PCoA                        | Distinct          |

---

Abbreviations: LN, lupus nephritis. HCs, healthy controls. N/A, not available.

Supplementary figure 1 The phylogenetic profile of differentially abundant taxa of LN patients.

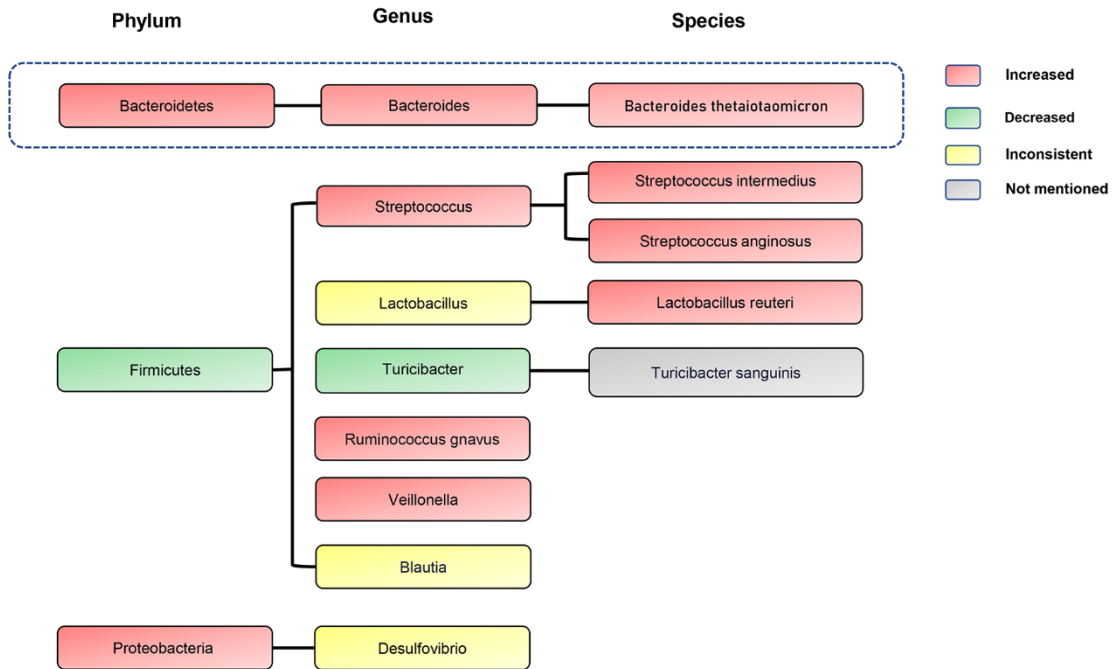

Supplement: IRNF_A_2285877_SM1406.pdf [file IRNF_A_2285877_SM1406.pdf]
